# Supplementary material for: Synthesis, Biological, Spectroscopic and Computational Investigations of Novel N-Acylhydrazone Derivatives of Pyrrolo[3,4-d]pyridazinone as Dual COX/LOX Inhibitors
Source: MDPI journal article supplement (doi:10.3390/molecules28145479), 2023-07-18

# Supplementary materials

## Table of Contents

|                                                                          |    |
|--------------------------------------------------------------------------|----|
| Table S1 - Structures of new compounds .....                             | 1  |
| Table S2 - NMR spectra of new compounds .....                            | 2  |
| Table S3 - Mass spectra of new compounds.....                            | 6  |
| Table S4 – FT-IR spectra of new compounds .....                          | 12 |
| Table S5 – Molecular formula strings (CSV) of reported compounds.....    | 17 |
| Figure S1 - Flowchart summarizing the Materials and Methods section..... | 18 |

## Table S1 - Structures of new compounds

|    |    |    |
|----|----|----|
| 2c | 3c | 4c |
|----|----|----|

|    |    |    |
|----|----|----|
| 5a | 6a | 7a |
|----|----|----|

|    |    |    |
|----|----|----|
| 5b | 6b | 7b |
|----|----|----|

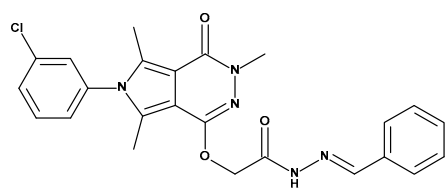

5c

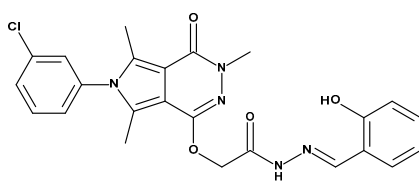

6c

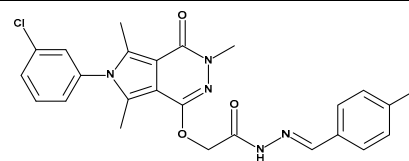

7c

Table S2 - NMR spectra of new compounds

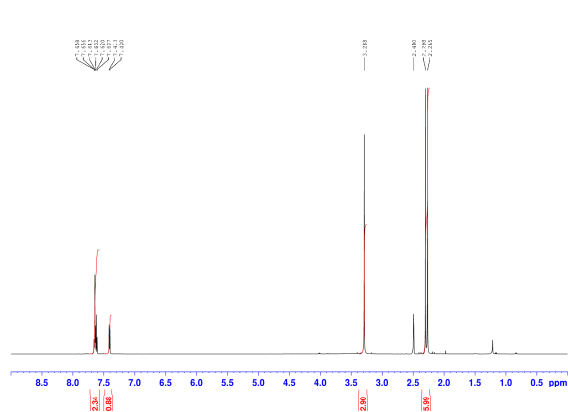

2c

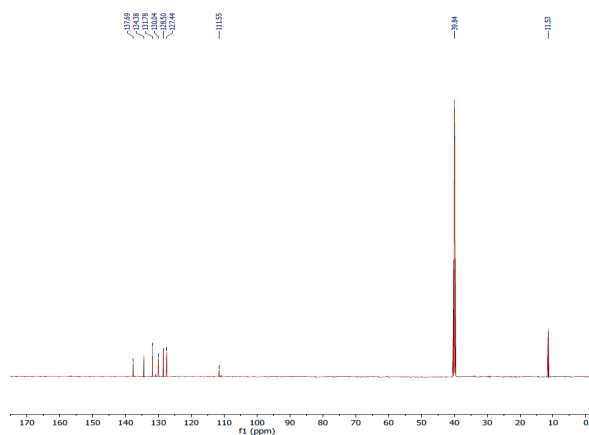



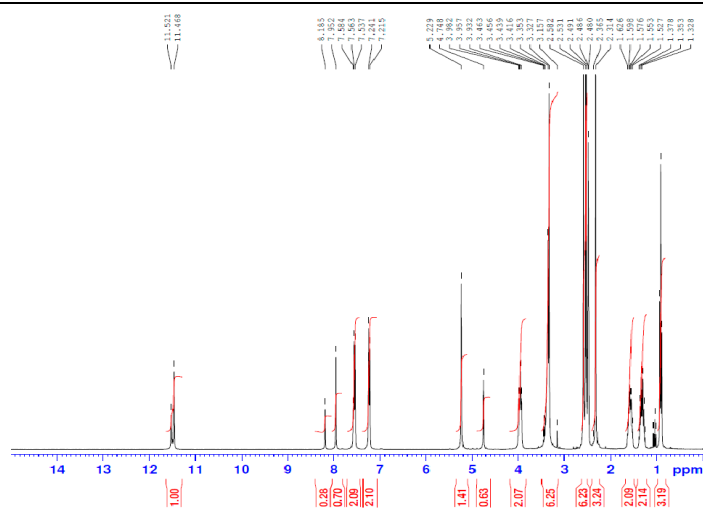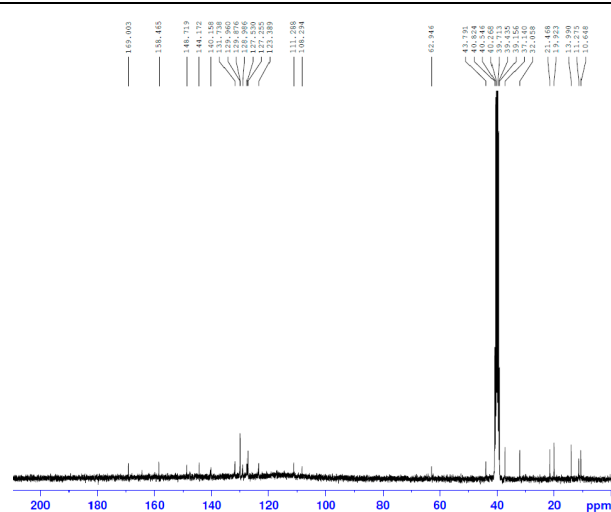



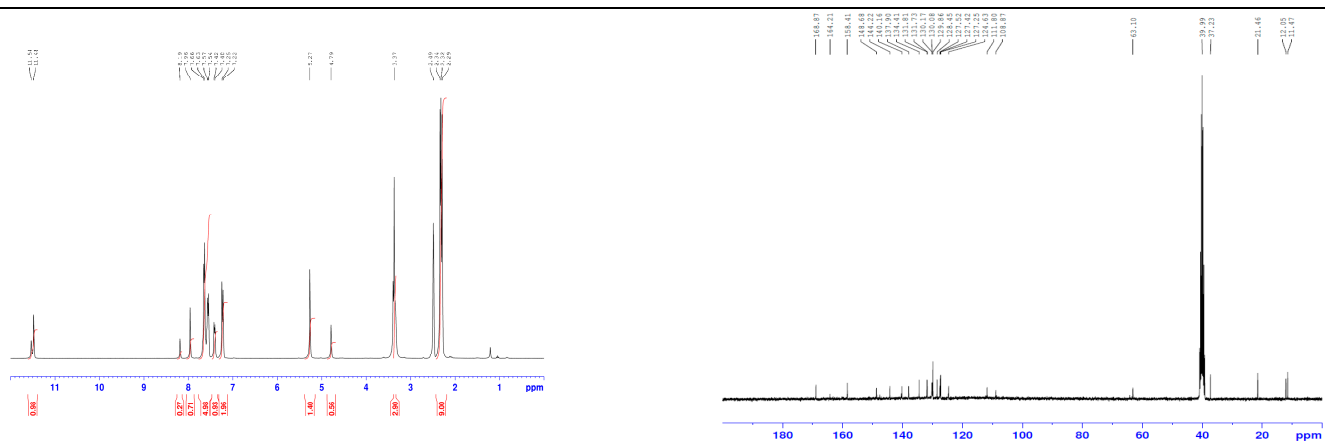

7c

Table S3 - Mass spectra of new compounds

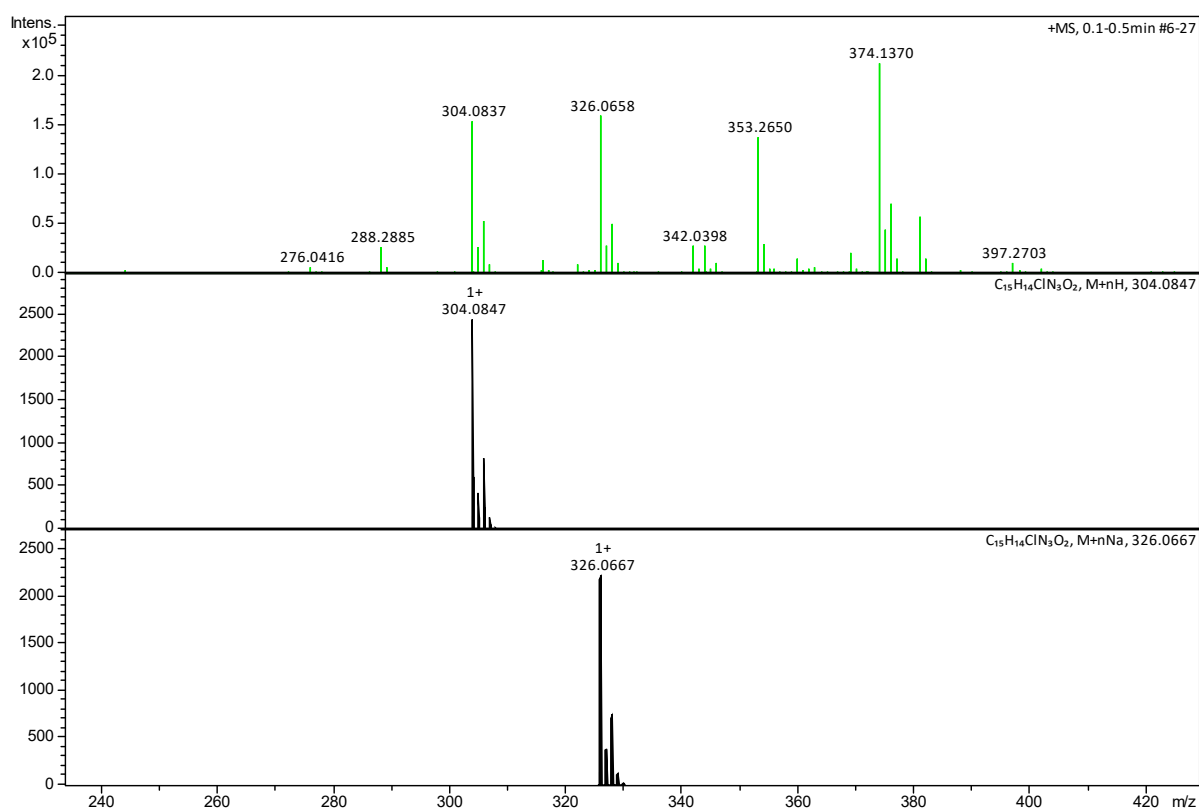

2c

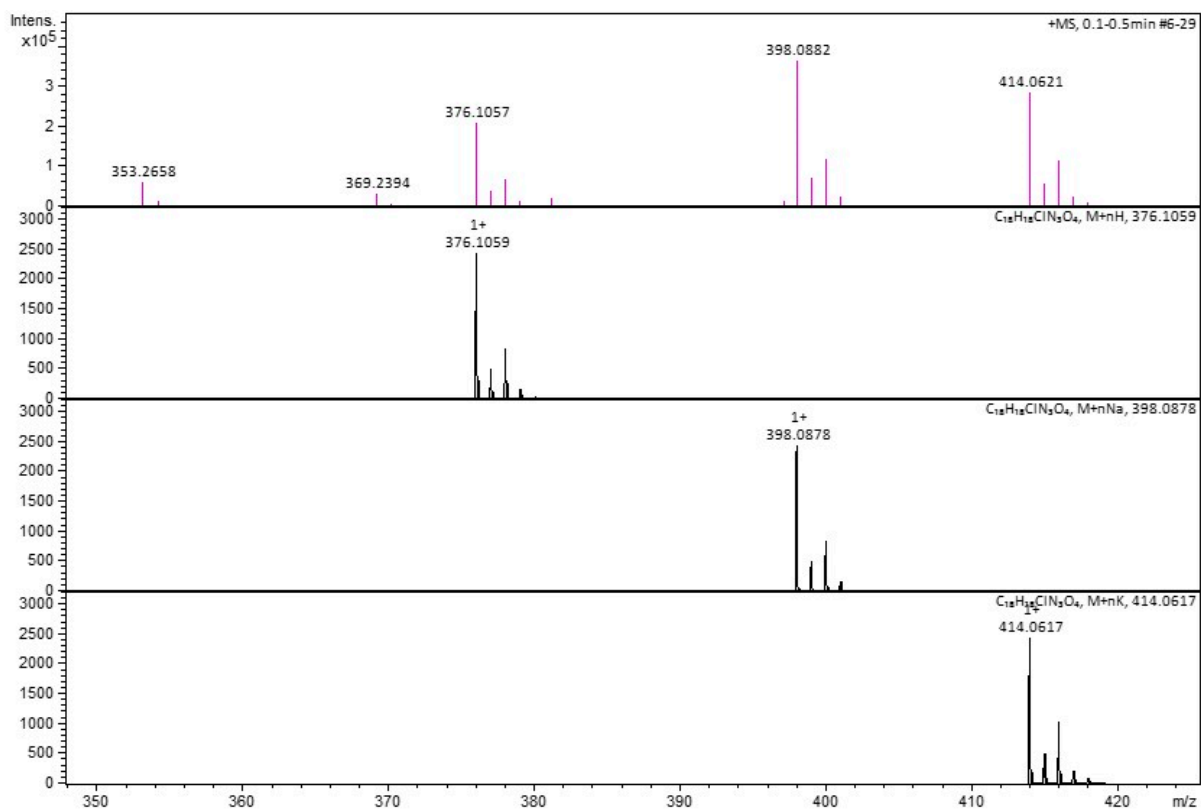

3c

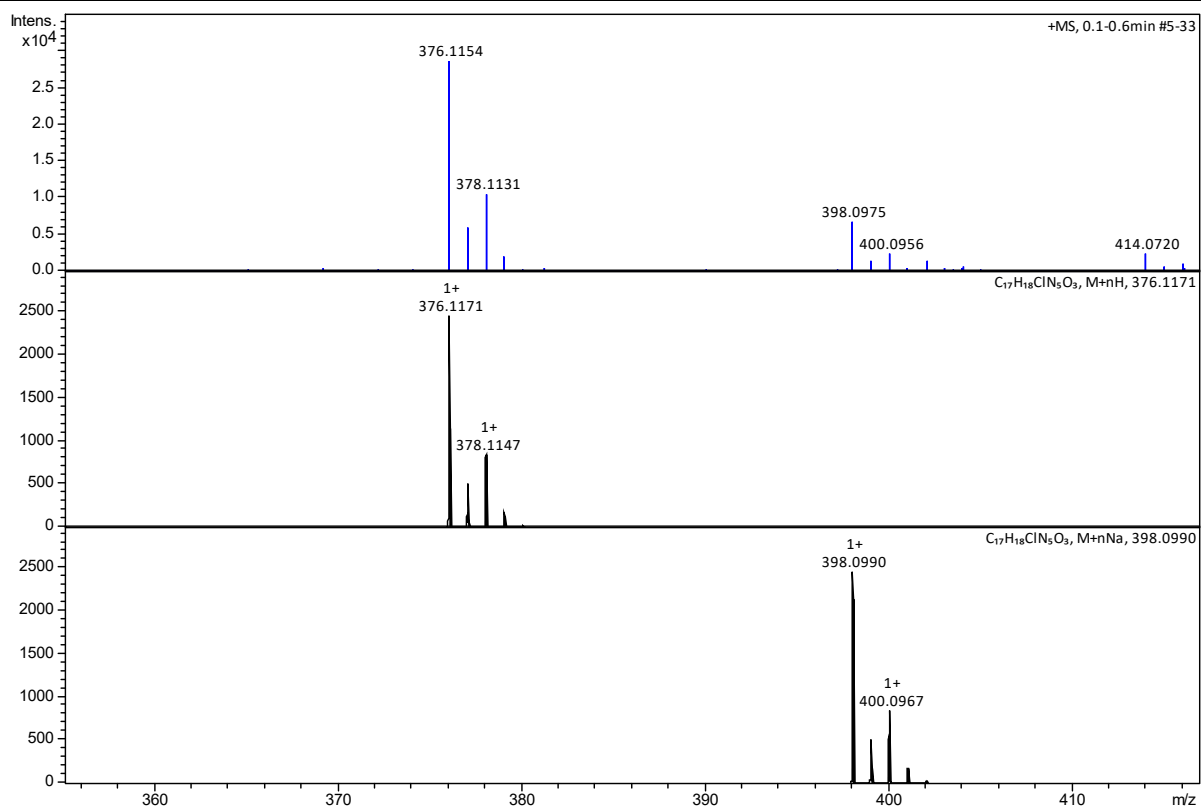

4c

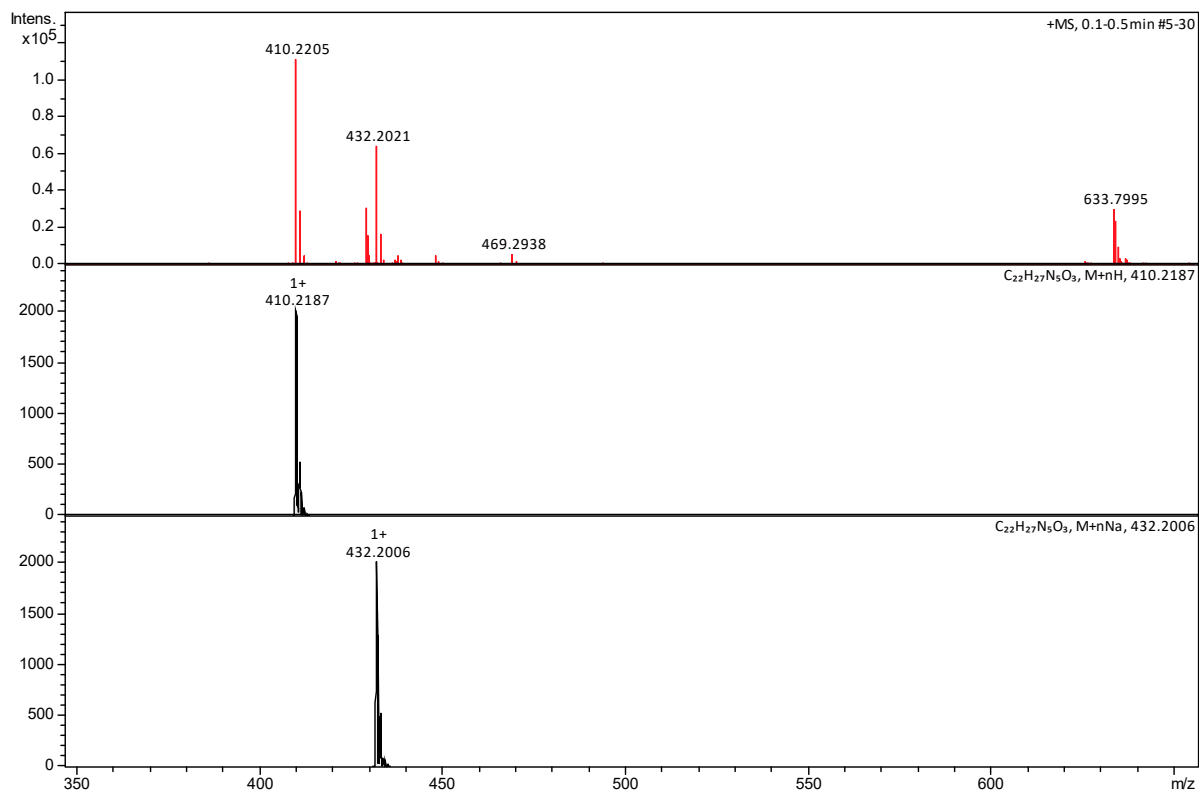

5a

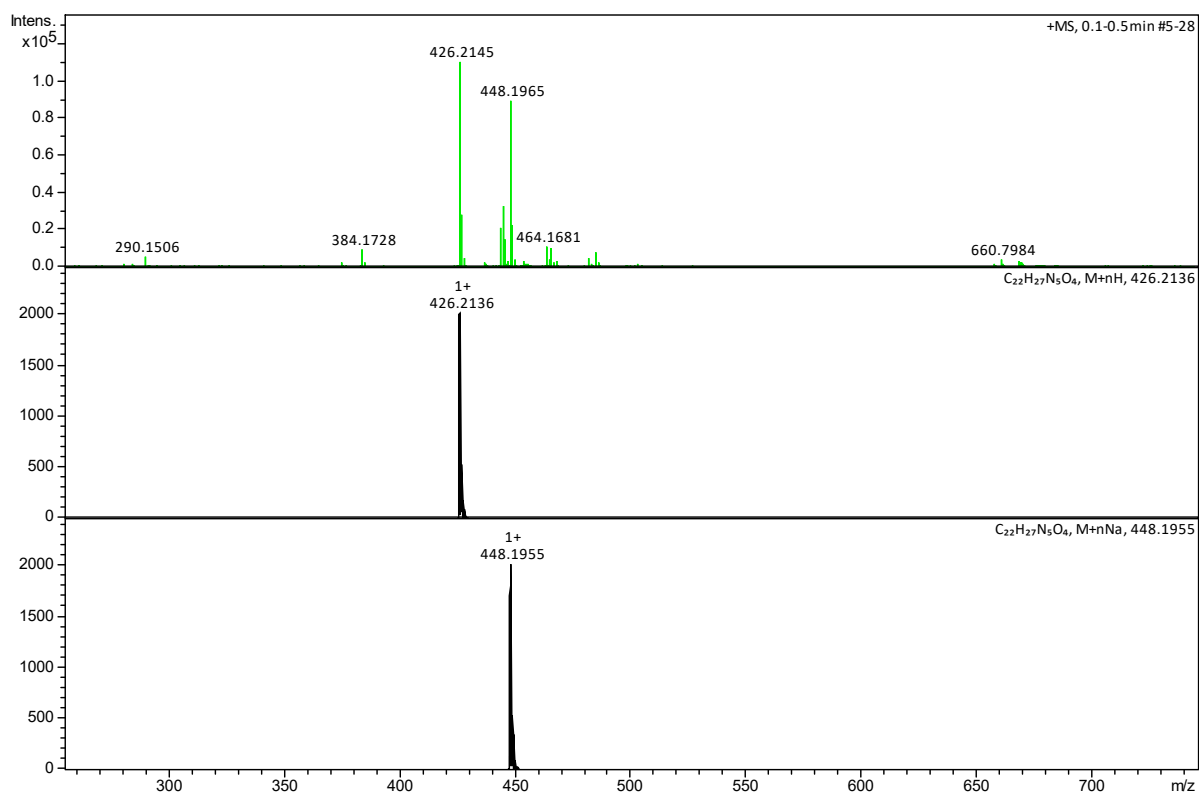

6a



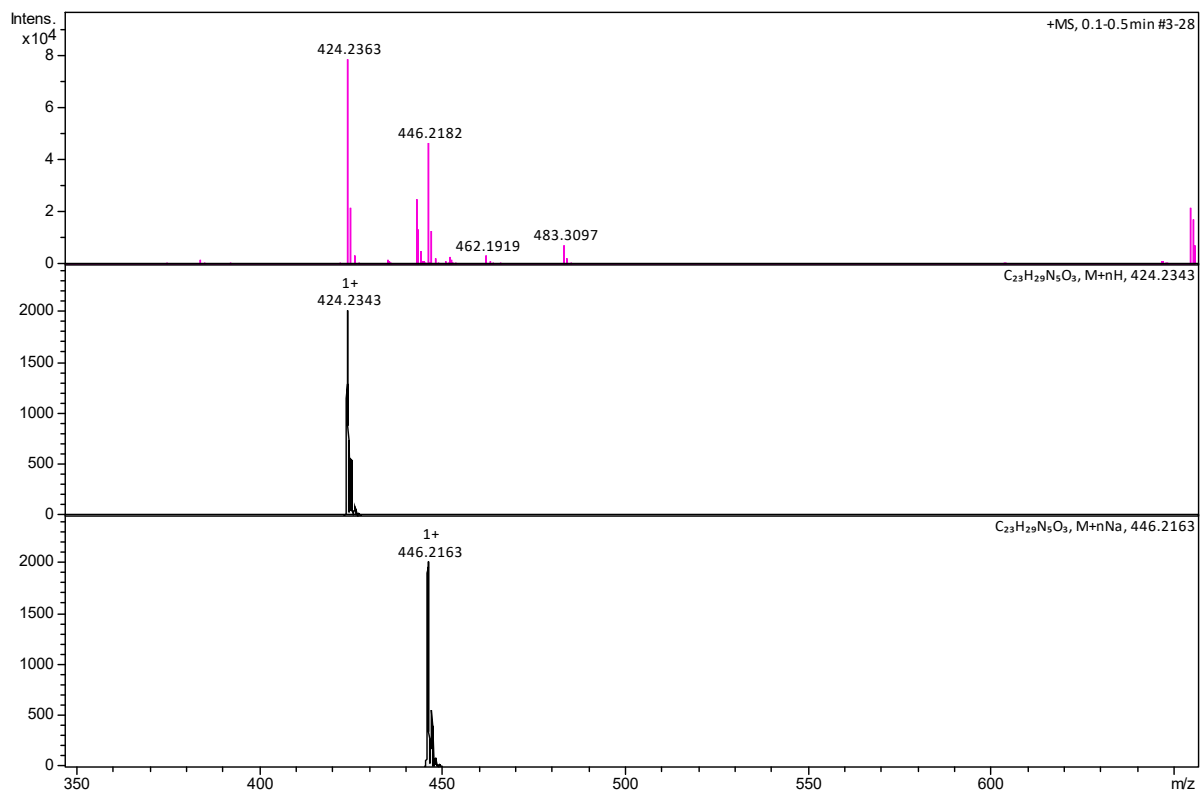

7a

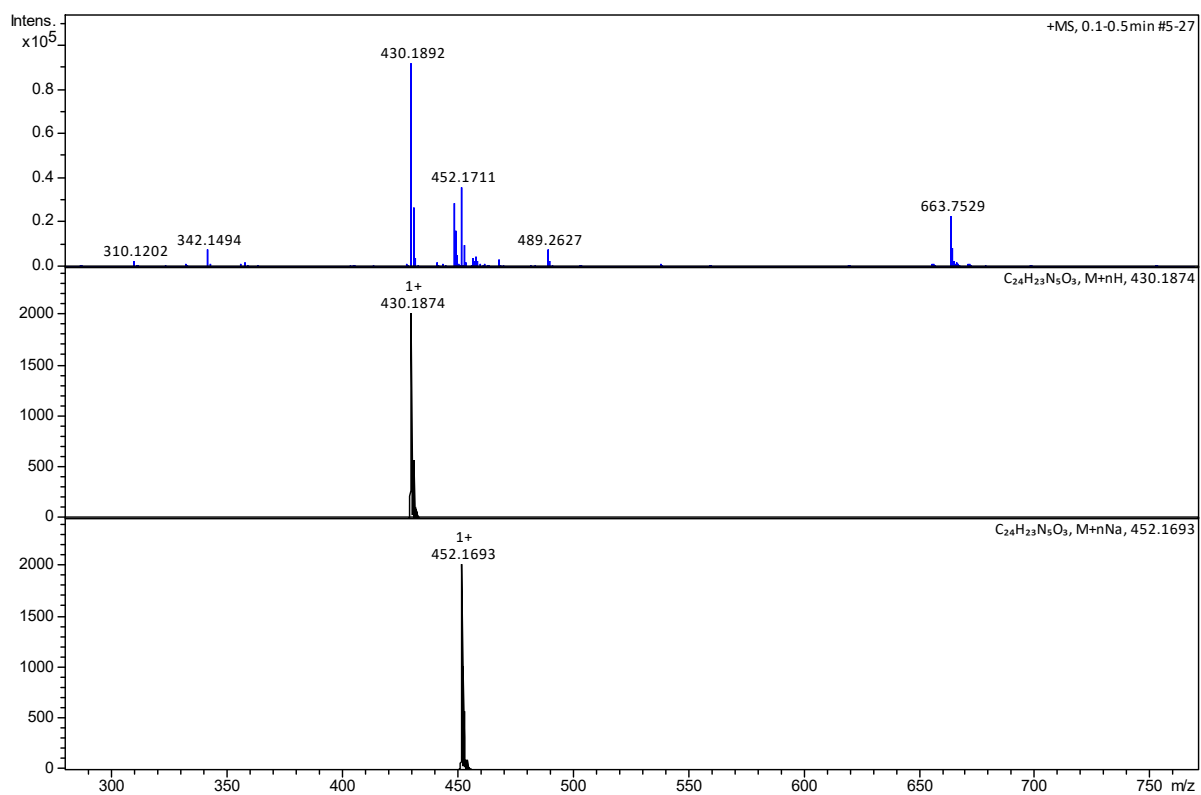

5b

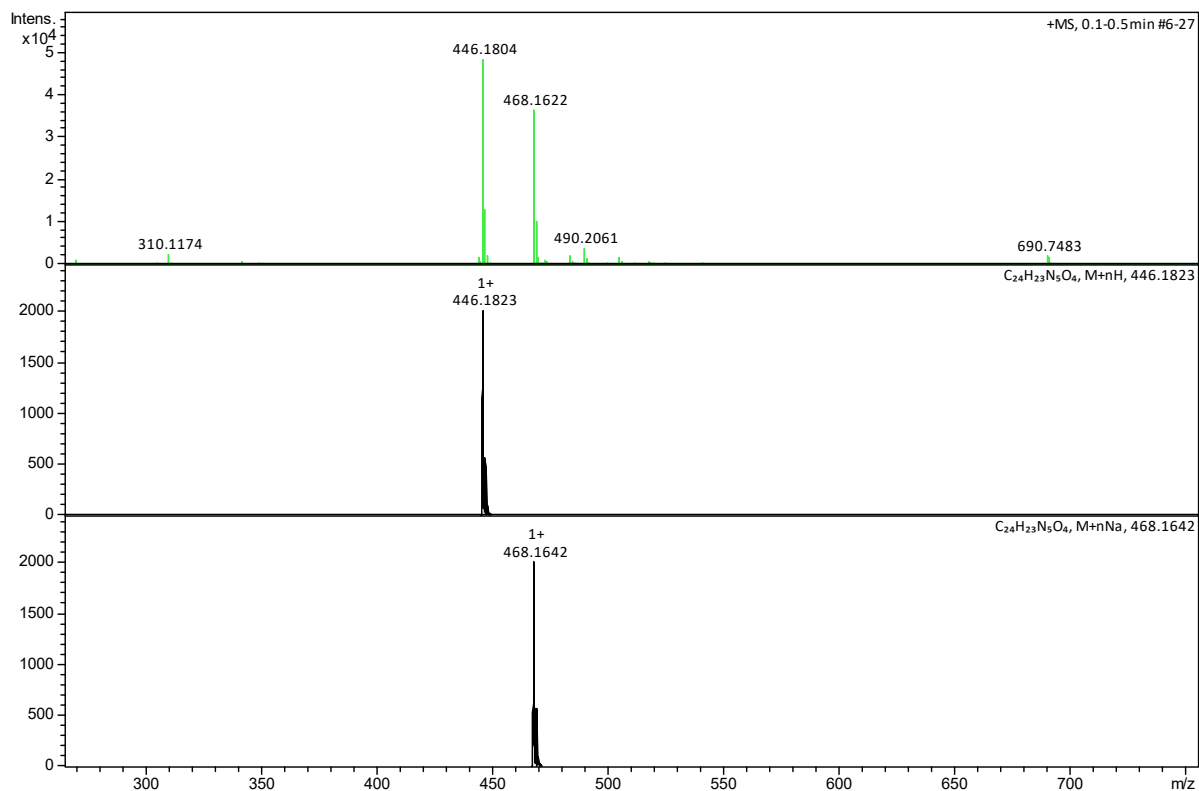

6b

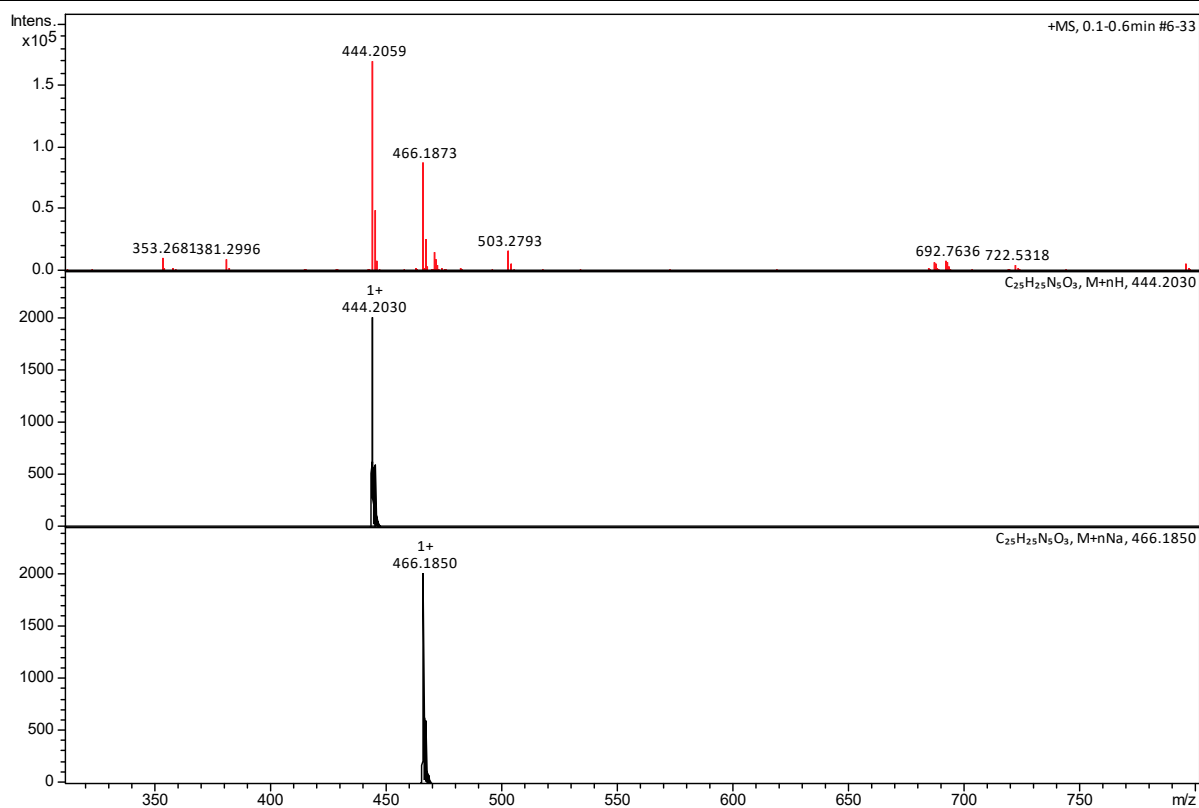

7b

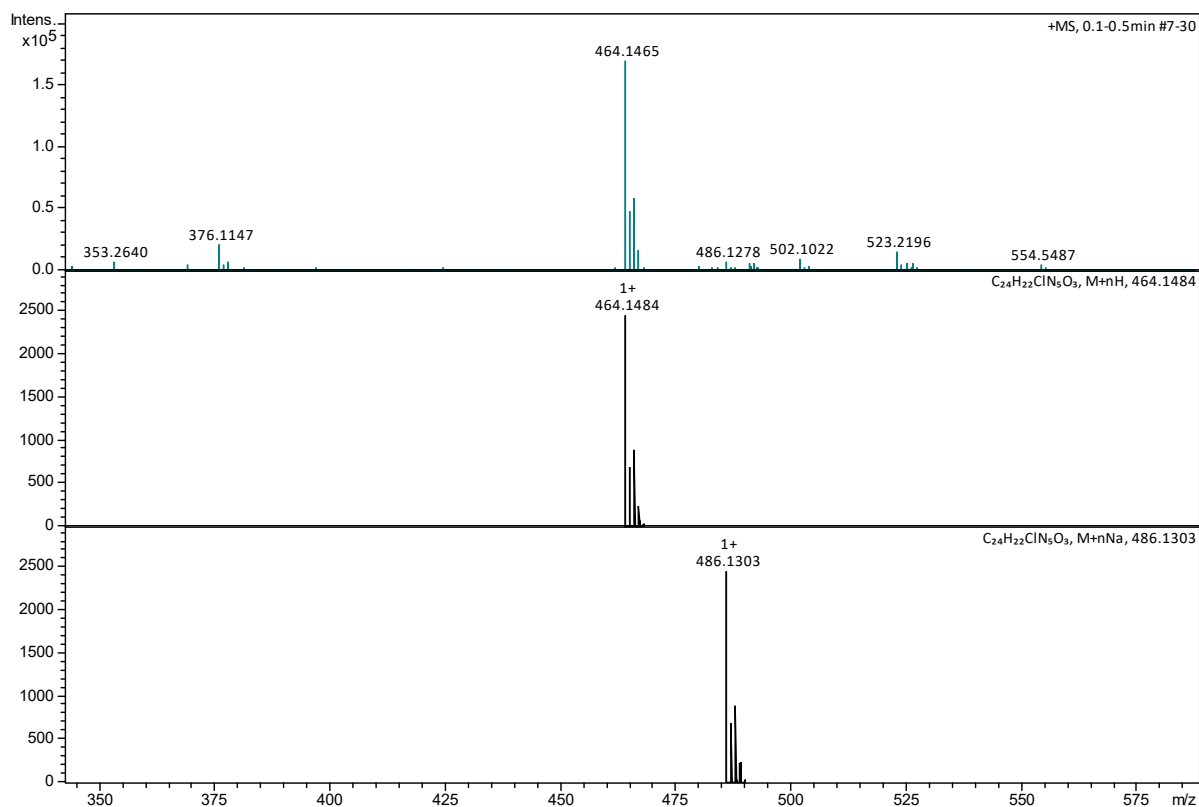

5c

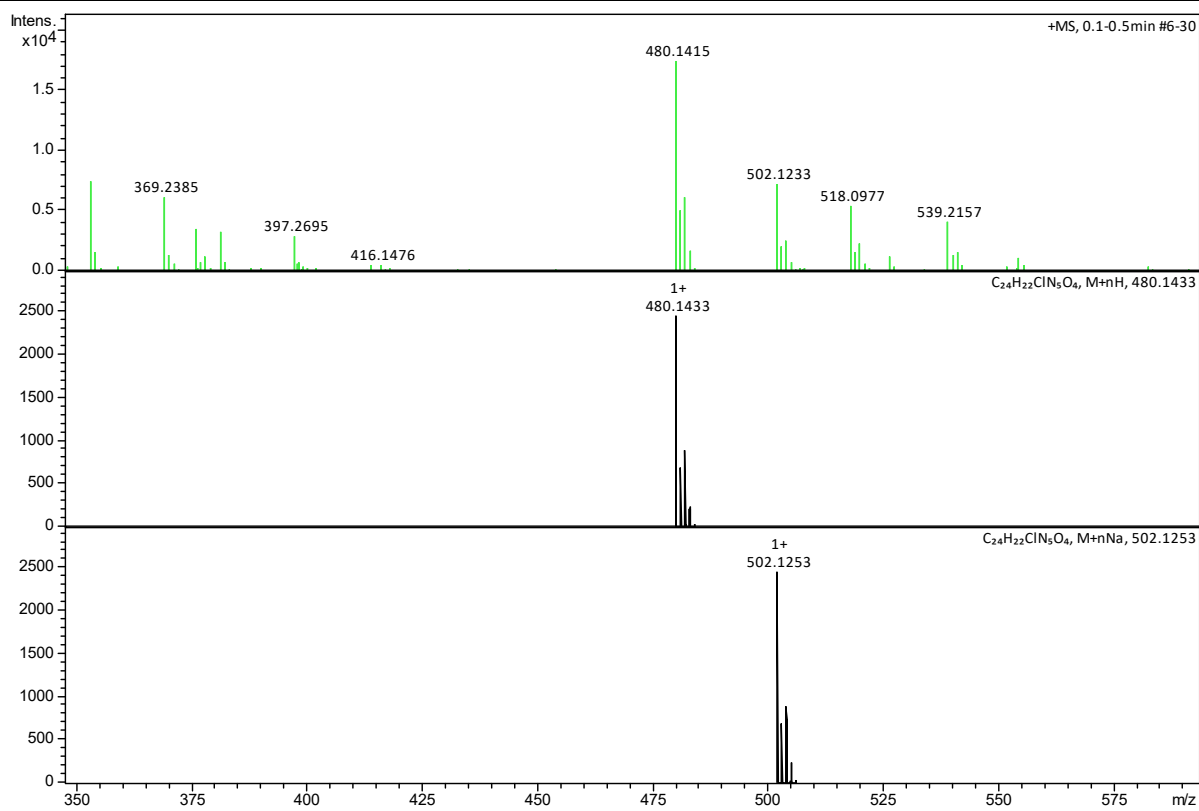

6c

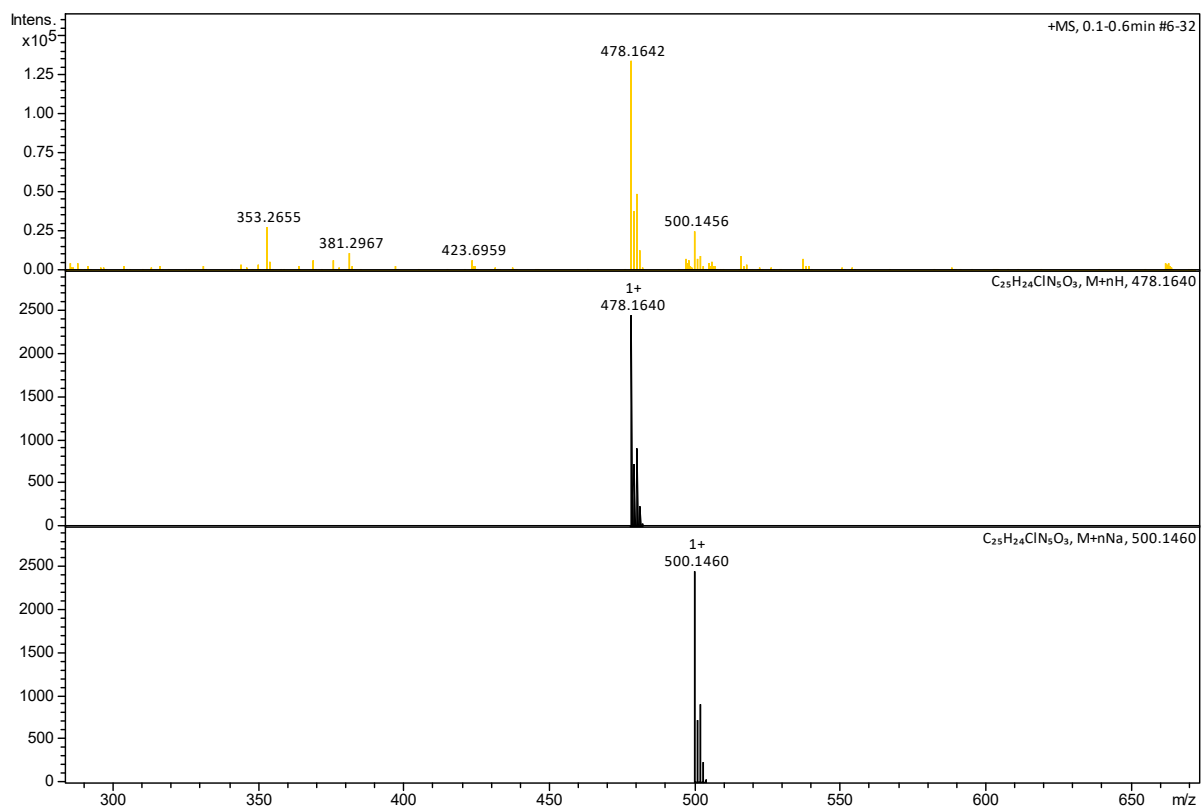

7c

Table S4 – FT-IR spectra of new compounds

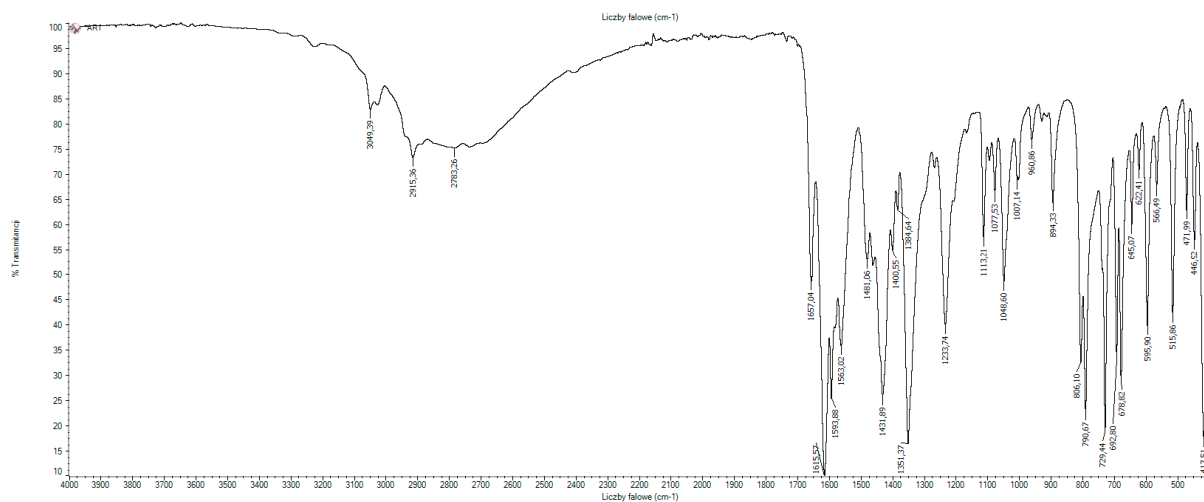

2c

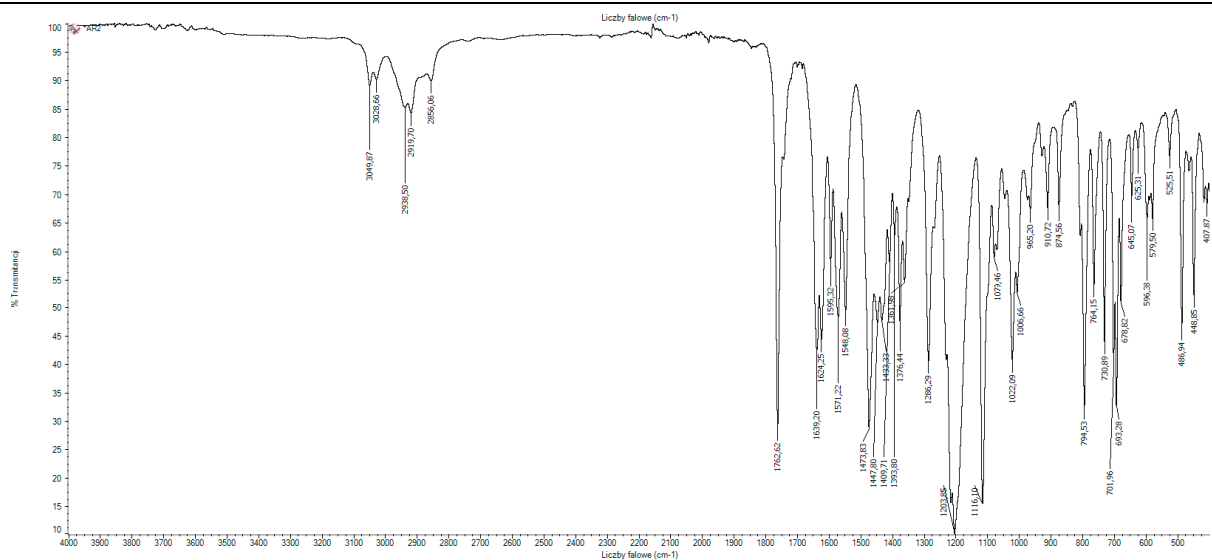

3c

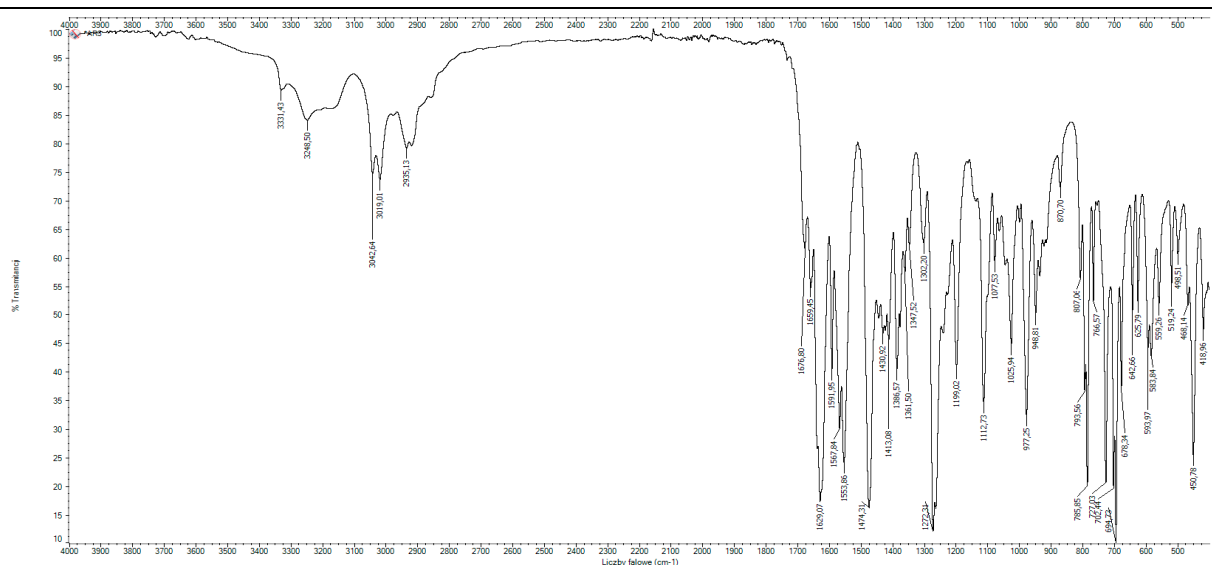

4c

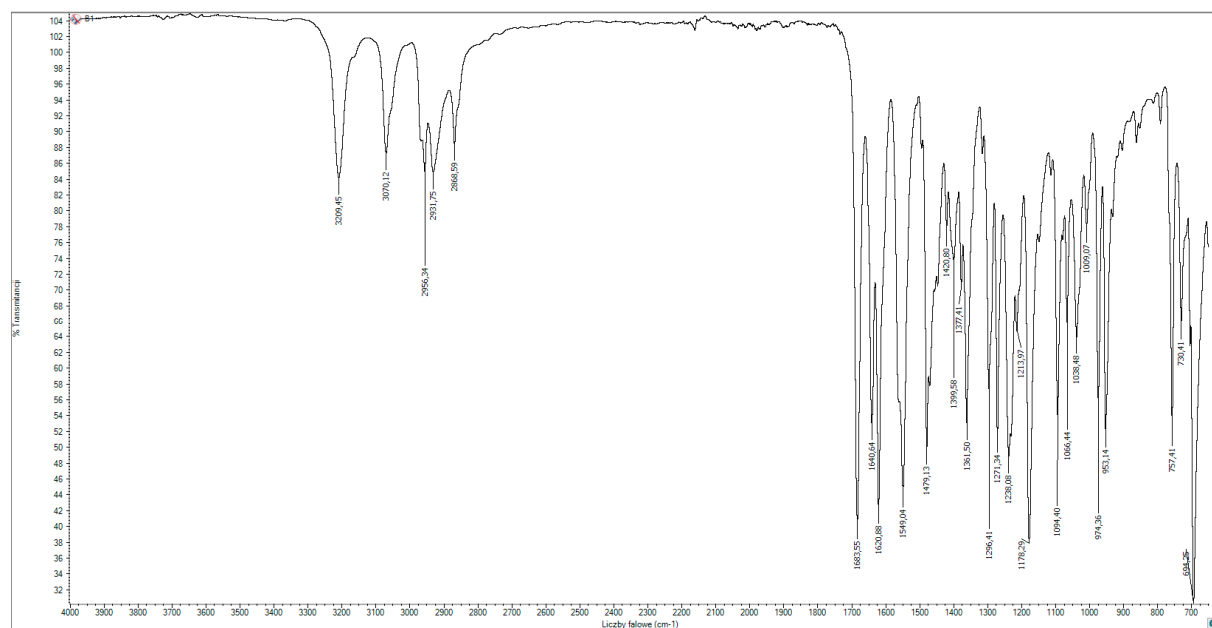

5a

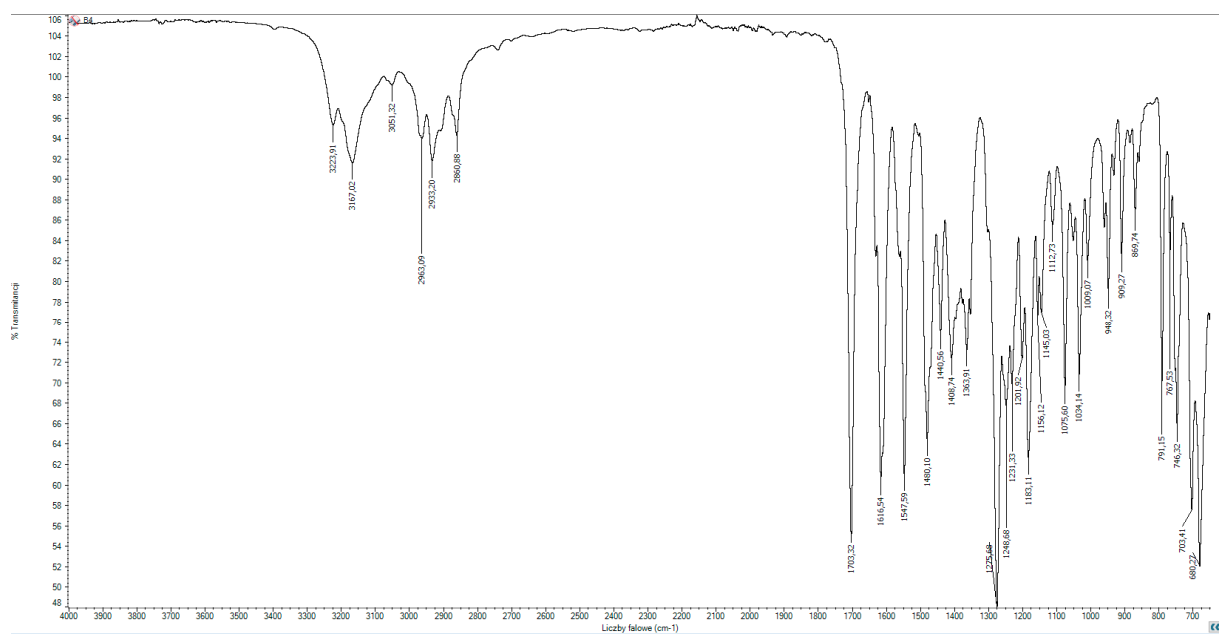

6a

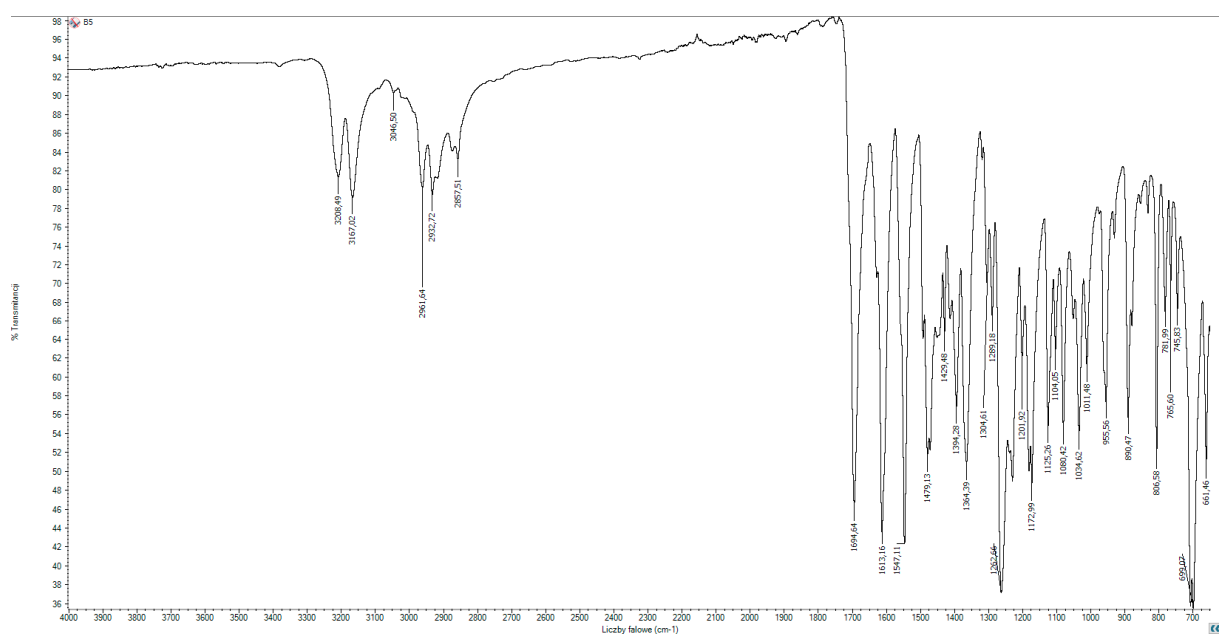

7a

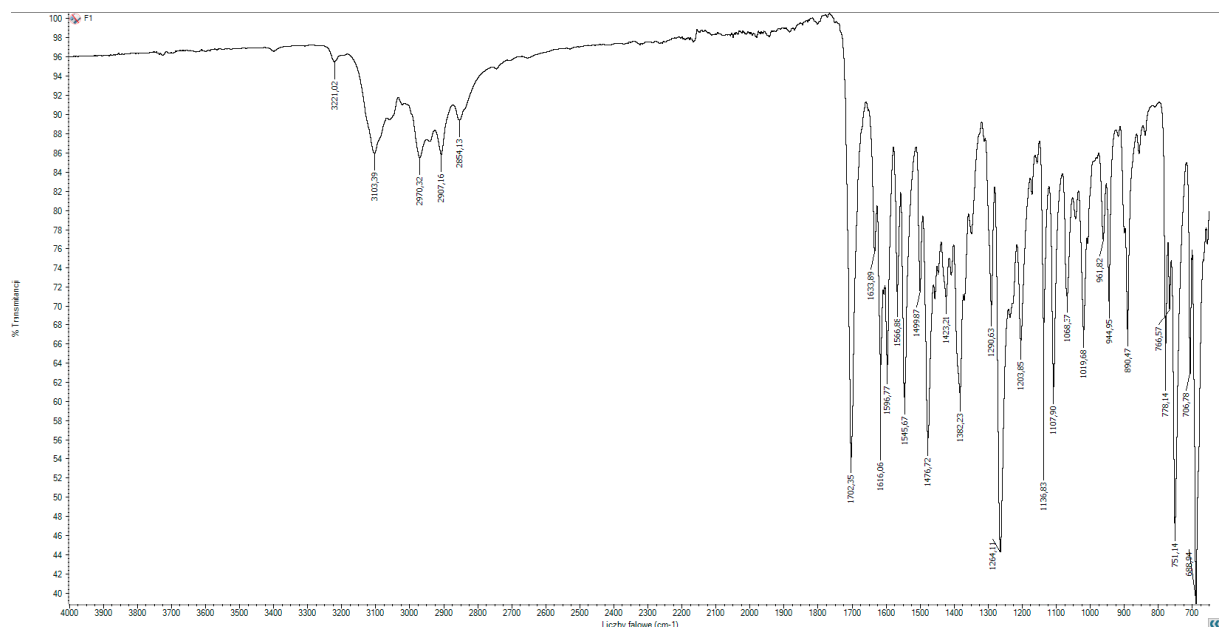

5b

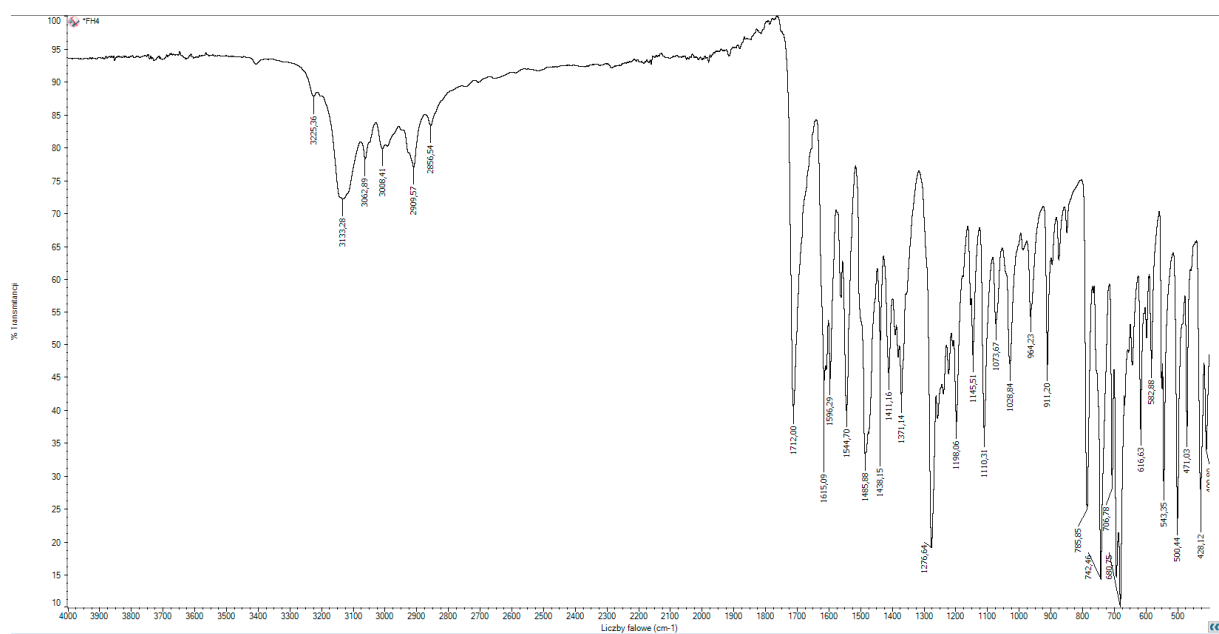

6b

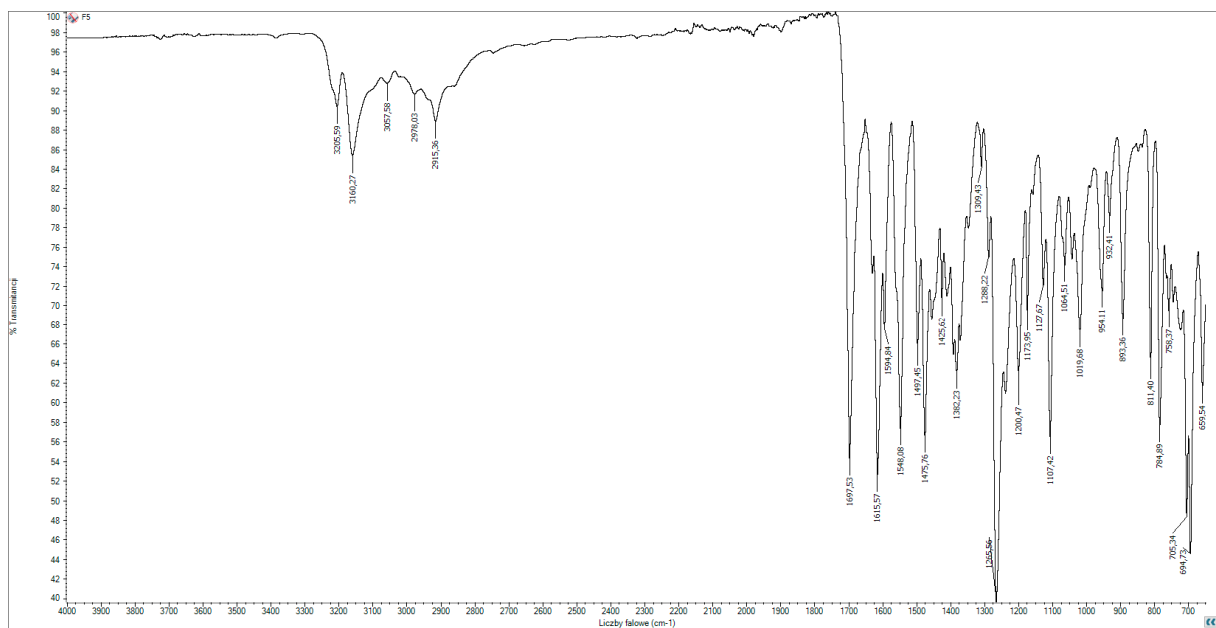

7b

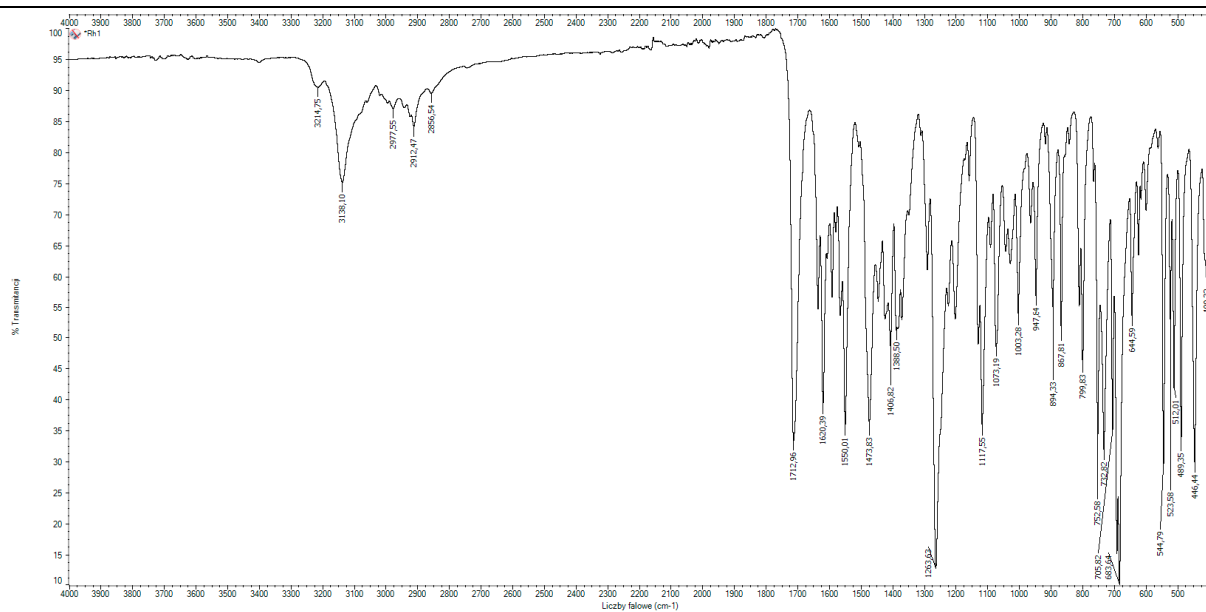

5c



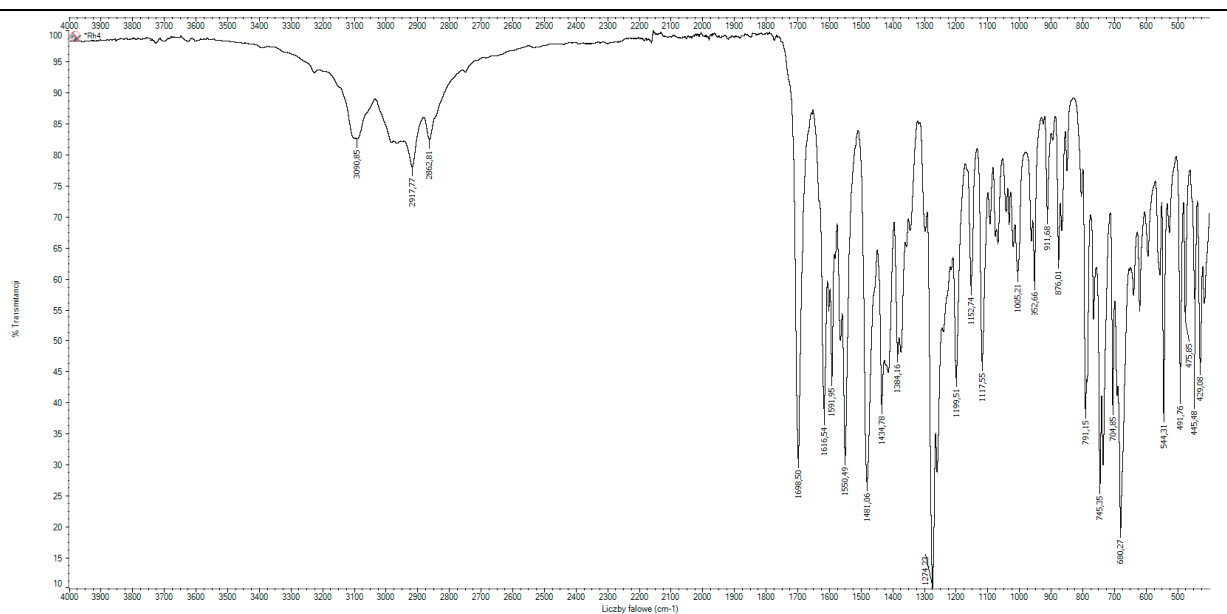

6c

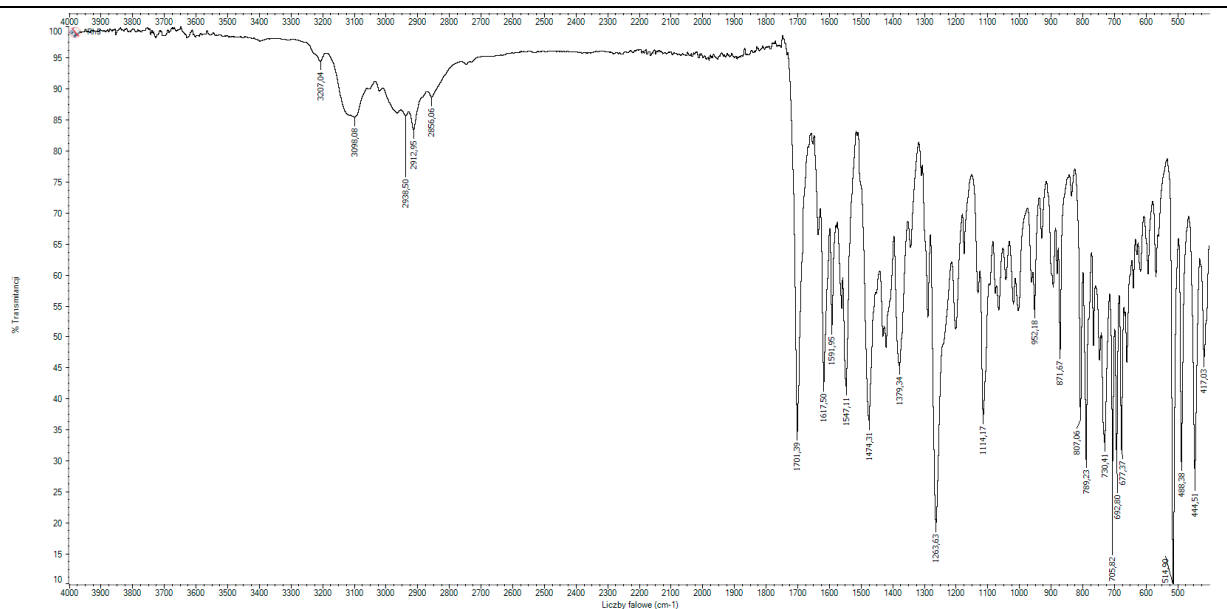

7c

**Table S5 – Molecular formula strings (CSV) of reported compounds**

|    | SMILE                                                                |
|----|----------------------------------------------------------------------|
| 2c | <chem>CN1NC(=O)c2c(C)n(c(C)c2C1=O)c3cccc(Cl)c3</chem>                |
| 3c | <chem>COC(=O)COC1=NN(C)C(=O)c2c(C)n(c(C)c12)c3cccc(Cl)c3</chem>      |
| 4c | <chem>CN1N=C(OCC(=O)NN)c2c(C)n(c(C)c2C1=O)c3cccc(Cl)c3</chem>        |
| 5a | <chem>CCCCn1c(C)c2C(=O)N(C)N=C(OCC(=O)N\N=C\c3ccccc3)c2c1C</chem>    |
| 6a | <chem>CCCCn1c(C)c2C(=O)N(C)N=C(OCC(=O)N\N=C\c3ccccc3O)c2c1C</chem>   |
| 7a | <chem>CCCCn1c(C)c2C(=O)N(C)N=C(OCC(=O)N\N=C\c3ccc(C)cc3)c2c1C</chem> |

---

**5b** CN1N=C(OCC(=O)N\N=C\c2cccc2)c3c(C)n(c(C)c3C1=O)c4cccc4  
**6b** CN1N=C(OCC(=O)N\N=C\c2cccc2O)c3c(C)n(c(C)c3C1=O)c4cccc4  
**7b** CN1N=C(OCC(=O)N\N=C\c2ccc(C)cc2)c3c(C)n(c(C)c3C1=O)c4cccc4  
**5c** CN1N=C(OCC(=O)N\N=C\c2cccc2)c3c(C)n(c(C)c3C1=O)c4cccc(Cl)c4  
**6c** CN1N=C(OCC(=O)N\N=C\c2cccc2O)c3c(C)n(c(C)c3C1=O)c4cccc(Cl)c4  
**7c** CN1N=C(OCC(=O)N\N=C\c2ccc(C)cc2)c3c(C)n(c(C)c3C1=O)c4cccc(Cl)c4

---

**Figure S1** - Flowchart summarizing the Materials and Methods section

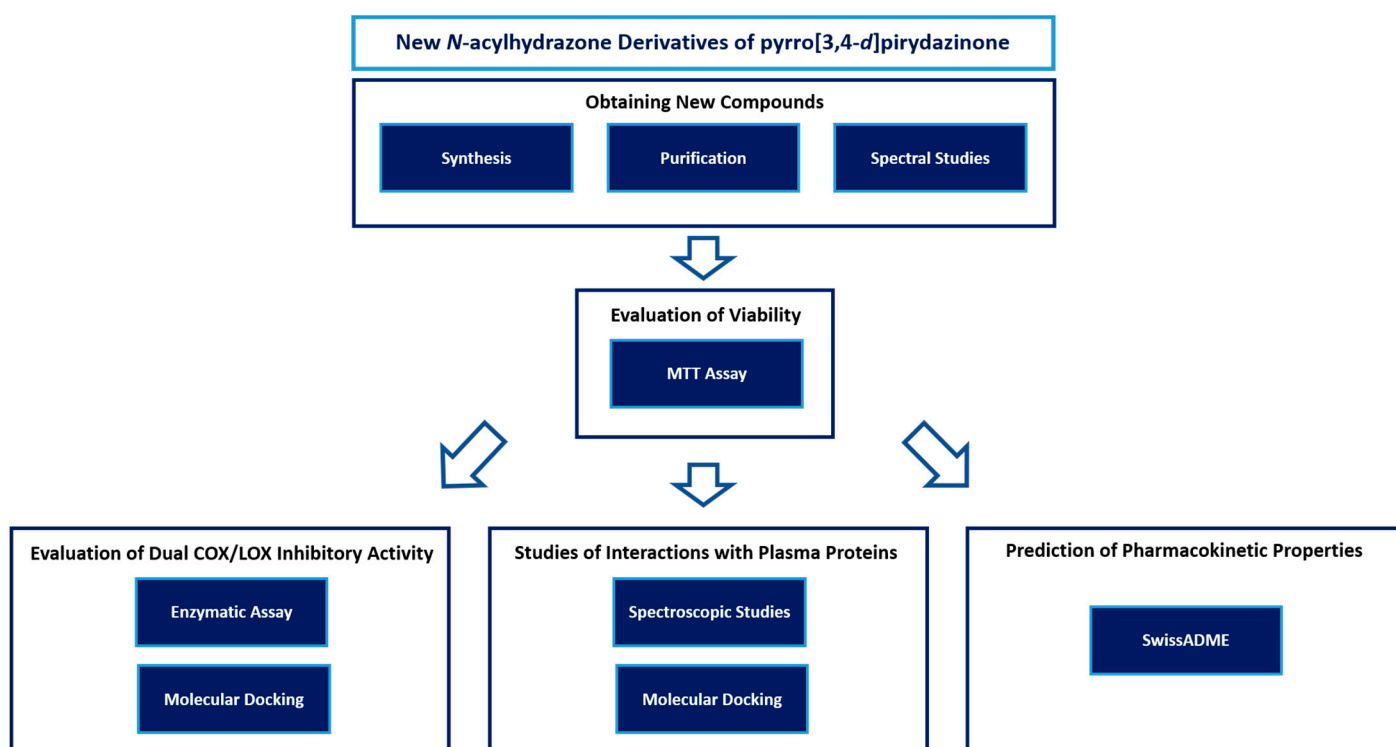

Supplement: s1 [file s1]
